# Supplementary material for: High-resolution secretory timeline from vesicle formation at the Golgi to fusion at the plasma membrane in S. cerevisiae
Source: eLife. 2022 Nov 4;11:e78750. doi: 10.7554/eLife.78750 (PMC9671497; doi:10.7554/eLife.78750)
Supplement: Supplementary file 1. — (1a) Yeast strains, (1b) plasmids, and (1c) oligos used in this study. (1d) Mouse Myosin-Vb sequence used for generating the fluorescent Myo2 markers used. (1e) All sample sizes for statistical tests. (1f) All raw tethering and component lifetime data. [file elife-78750-supp1.xlsx]

## Sheet: Supplementary file 1a
Supplementary file 1a - Yeast Strains - Gingras et al. 2022
Yeast ID	Brief Description	Mating	Source	Abbreviated Genotype
BY4741	Wildtype a (Backgrounds of all others)	a	Brachmann et al., 1998	his3∆1 leu2∆0 ura3∆0 met15∆0
BY4742	Wildtype α (Backgrounds of all others)	α	Brachmann et al., 1998	his3∆1 leu2∆0 ura3∆0 lys2∆0
9274	mNG-Ypt31/mNG-Ypt31	Diploid	This Study	mNG-Ypt31::Leu2/mNG-Ypt31::Leu2
9559	mScarlet-Ypt31/mScarlet-Ypt31	Diploid	This Study	mScarlet-Ypt31::Leu2/mScarlet-Ypt31::Leu2
9547	mScarlet-Ypt31/mScarlet-Ypt31 GFP-Sec4/Sec4	Diploid	This Study	mScarlet-Ypt31::Leu2/mScarlet-Ypt31::Leu2 GFP-Sec4::Ura/Sec4
9568	mScarlet-Ypt31/mScarlet-Ypt31 mNG-mCC-Myo2 Marker	Diploid	This Study	mScarlet-Ypt31::Leu2/mScarlet-Ypt31::Leu2 mNG-mCC-Myo2(CBD)::His3
9569	mScarlet-Ypt31/mScarlet-Ypt31 Sec2-mNG/Sec2-mNG	Diploid	This Study	mScarlet-Ypt31::Leu2/mScarlet-Ypt31::Leu2 Sec2-mNG::Ura3/Sec2-mNG::Ura3
9548	mScarlet-Ypt31/mScarlet-Ypt31 mNG-Ypt32/mNG-Ypt32	Diploid	This Study	mScarlet-Ypt31::Leu/mScarlet-Ypt31::Leu mNG-Ypt32::Leu/mNG-Ypt32::Leu
9172	Sec7-mNG	a	This Study	Sec7-mNG::Leu2
9173	Sec7-mNG	α	This Study	Sec7-mNG::Leu2
XXXX	Sec7-mNG/Sec7-mNG	Diploid	This Study	Unstored mating of 9172 and 9173 (above)
9497	mScarlet-Ypt32/mScarlet-Ypt32 GFP-Sec4/Sec4	Diploid	This Study	pYpt1-mScarlet-Ypt32::Leu2/pYpt1-mScarlet-Ypt32::Leu2 GFP-Sec4::Ura3/Sec4
9498	mScarlet-Ypt32/mScarlet-Ypt32 Sec2-mNG/Sec2-mNG	Diploid	This Study	pYpt1-mScarlet-Ypt32::Leu2/pYpt1-mScarlet-Ypt32::Leu2 Sec2-mNG::Ura3/Sec2-mNG::Ura3
9561	mNG-mCC-Myo2 Marker	a	This Study	His3::mNG-mCC-Myo2(CBD)
9195	Sec3-mNG	a	This Study	Sec3-mNG::Ura3
9454	Sec3-mNG/Sec3-mNG	Diploid	This Study	Sec3-mNG::Ura3/Sec3-mNG::Ura3
9039	Sec3-GFP/Sec3	Diploid	This Study	Sec3-GFP::His/Sec3
9040	Sec5-GFP/Sec5	Diploid	This Study	Sec5-GFP::His/Sec5
9281	Sec5-mNG	a	This Study	Sec5-mNG::Ura3
9288	Sec6-mNG	a	This Study	Sec6-mNG::Ura3
9289	Sec8-mNG	a	This Study	Sec8-mNG::Ura3
9290	Sec10-mNG	a	This Study	Sec10-mNG::Ura3
9282	Sec15-mNG	a	This Study	Sec15-mNG::Ura3
9291	Exo70-mNG	a	This Study	Exo70-mNG::Ura3
9283	Exo84-mNG	a	This Study	Exo84-mNG::Ura3
9294	Sec15-mNG	α	This Study	Sec15-mNG::Ura3
4660	Exocyst-3x-mNG	α	This Study	Exo84-mNG::Ura3 Sec15-mNG::Ura3 Sec10-mNG::Ura3
4662	Exocyst-3x-mNG	a	This Study	Exo84-mNG::Ura3 Sec15-mNG::Ura3 Sec10-mNG::Ura3
XXXX	Exocyst-3x-mNG	Diploid	This Study	Unstored mating of 4660 and 4662 (above)
9557	Exocyst-3x-mScarlet (mS)	a	This Study	Exo84-mS::NatMX Sec15-mS::NatMX Sec10-mS::NatMX
9558	Exocyst-3x-mScarlet (mS)	α	This Study	Exo84-mS::NatMX Sec15-mS::NatMX Sec10-mS::NatMX
9565	Exocyst-3x-mS/Exocyst-3x-mS mNG-mCC-Myo2 Marker	Diploid	This Study	Exocyst-3x-mS::NatMX/Exocyst-3x-mS::NatMX mNG-mCC-Myo2(CBD)::His3/his3∆
9042	GFP-Sec4	a	This Study	GFP-Sec4::Ura3
3410	GFP-Sec4	α	Donovan and Bretscher, 2012	GFP-Sec4::Ura3
9043	GFP-Sec4/Sec4	Diploid	This Study	GFP-Sec4::Ura3/Sec4
9044	GFP-Sec4/GFP-Sec4	Diploid	This Study	GFP-Sec4::Ura3/GFP-Sec4::Ura3
9191	GFP-Sec4 vps1∆	α	This Study	vps1∆::HisMX GFP-Sec4::Ura3
3090	Bni1-GFP/Bni1	Diploid	Shin et al., 2018	Bni1-GFP::Ura3/Bni1
9457	Boi2-mNG/Boi2-mNG	Diploid	This Study	Boi2-mNG::Leu2/Boi2-mNG::Leu2
9466	Exocyst-3x-mS/Exocyst-3x-mS Boi2-mNG/Boi2-mNG	Diploid	This Study	Exocyst-3x-mS::NatMX/Exocyst-3x-mS::NatMX Boi2-mNG::Leu2/Boi2-mNG::Leu2
9080	msb4∆/msb4∆ msb3∆/Msb3 GFP-Sec4/Sec4	Diploid	This Study	msb4∆::His/msb4∆::His msb3∆::Leu/Msb3 GFP-Sec4::Ura/Sec4
9082	msb3∆/msb3∆ msb4∆/Msb4 GFP-Sec4/Sec4	Diploid	This Study	msb3∆::Kan/msb3∆::Leu msb4∆::His/Msb4 GFP-Sec4::Ura/Sec4
9077	GFP-Sec4/Sec4-Q79L	Diploid	This Study	GFP-Sec4::Ura/Sec4-Q79L::Ura Increases vesicle tethering time.
9104	GFP-Sec4/Sec4 mCherryPM	Diploid	This Study	GFP-Sec4::Ura/Sec4 His3::mCherryPM
9109	msb3∆/msb3∆ msb4∆/Msb4 GFP-Sec4/Sec4 mCherryPM	Diploid	This Study	msb3∆::Kan/msb3∆::Leu msb4∆::His/Msb4 GFP-Sec4::Ura/Sec4 His3::mCherryPM
9118	Gdi1/gdi1∆ GFP-Sec4/Sec4	Diploid	This Study	Gdi1∆::His/Gdi1 GFP-Sec4::Ura/Sec4
9426	Sec2-mNG/Sec2-mNG	Diploid	This Study	Sec2-mNG::Leu2/Sec2-mNG::Leu2
9453	Smy1-mNG/Smy1-mNG	Diploid	This Study	Smy1-mNG::Leu2/Smy1-mNG::Leu2
9504	Sro7-mNG/Sro7-mNG	Diploid	This Study	Sro7-mNG::Leu2/Sro7-mNG::Leu2
9486	Sro7-mNG/Sro7-mNG sec6-4/sec6-4	Diploid	This Study	Sro7-mNG::Leu2/Sro7-mNG::Leu2 sec6-4::His/Sec6-4::His
9525	Mso1-mNG/Mso1-mNG	Diploid	This Study	Mso1-mNG::Leu2/Mso1-mNG::Leu2
9507	Sec1-mNG/Sec1-mNG	Diploid	This Study	Sec1-mNG::Leu2/Sec1-mNG::Leu2
9182	Cse4-mNG	a	Gingras et al., 2020	Cse4-mNG::Ura3
9315	Rho3-imNG	α	Gingras et al., 2020	Rho3-imNG::Leu2
9477	Exocyst-3x-mS/Exocyst-3x-mS GFP-Sec4/Sec4	Diploid	This Study	Exocyst-3x-mS::NatMX/Exocyst-3x-mS::NatMX GFP-Sec4::Ura3/Sec4
9487	Exocyst-3x-mS/Exocyst-3x-mS Rho3-imNG/Rho3	Diploid	This Study	Exocyst-3x-mS::NatMX/Exocyst-3x-mS::NatMX Rho3-imNG::Leu2/Rho3
9485	Exocyst-3x-mS/Exocyst-3x-mS Sro7-mNG/Sro7-mNG	Diploid	This Study	Exocyst-3x-mS::NatMX/Exocyst-3x-mS::NatMX Sro7-mNG::Leu2/Sro7-mNG::Leu2
9475	Exocyst-3x-mS/Exocyst-3x-mS Sec1-mNG/Sec1-mNG	Diploid	This Study	Exocyst-3x-mS::NatMX/Exocyst-3x-mS::NatMX Sec1-mNG::Leu2/Sec1-mNG::Leu2
9459	Smy1-mScarlet/Smy1-mScarlet Sec1-mNG/Sec1-mNG	Diploid	This Study	Smy1-mScarlet::Ura3/Smy1-mScarlet::Ura3 Sec1-mNG::Leu2/Sec1-mNG::Leu2
9136	sso2∆	a	This Study	sso2∆::His
9142	sso2∆ GFP-Sec4	α	This Study	sso2∆::His GFP-Sec4::Ura
XXXX	sso2∆/sso2∆ GFP-Sec4/Sec4	Diploid	This Study	Unstored mating of 9136 and 9142 (above)
9099	sro7∆/sro7∆ GFP-Sec4/Sec4	Diploid	This Study	sro7∆::KanMX/sro7∆::KanMX GFP-Sec4::Ura3/Sec4
9121	sec9∆/Sec9 GFP-Sec4/Sec4	Diploid	This Study	Ssc9∆::His/Sec9 GFP-Sec4::Ura3/Sec4
9141	snc2∆ GFP-Sec4	α	This Study	snc2∆::His GFP-Sec4::Ura3
XXXX	snc2∆/Snc2 GFP-Sec4/Sec4	Diploid	This Study	Unstored mating of 9141 with BY4741(a)
9265	sec2∆/Sec2 GFP-Sec4/Sec4	Diploid	This Study	sec2∆::His/Sec2 GFP-Sec4::Ura3/Sec4
9122	rho3∆/Rho3 GFP-Sec4/Sec4	Diploid	This Study	rho3∆::His/Rho3 GFP-Sec4::Ura3/Sec4
9135	mso1∆	a	This Study	mso1∆::HisMX
9137	mso1∆	α	This Study	mso1∆::HisMX
9438	mso1∆ GFP-Sec4	a	This Study	mso1∆::HisMX GFP-Sec4::Ura3
XXXX	mso1∆/mso1∆ GFP-Sec4/Sec4	Diploid	This Study	Unstored mating of 9137 and 9438 (above)
9117	Sec1∆/Sec1 GFP-Sec4/Sec4	Diploid	This Study	sec1∆::His/Sec1 GFP-Sec4::Ura3/Sec4
9461	myo2∆/Myo2 GFP-Sec4/Sec4	Diploid	This Study	myo2∆::KanMX/Myo2 GFP-Sec4::Ura3/Sec4
9456	smy1∆/smy1∆ GFP-Sec4/Sec4	Diploid	This Study	smy1∆::KanMX/smy1∆::His GFP-Sec4::Ura3/Sec4
9549	msb3∆/msb3∆ msb4∆/Msb4 Sro7-mNG/Sro7-mNG	Diploid	This Study	msb3∆::Kan/msb3∆::Leu msb4∆::His/Msb4 Sro7-mNG::Leu2/Sro7-mNG::Ura3
9550	msb3∆/msb3∆ msb4∆/Msb4 Sec1-mNG/Sec1-mNG	Diploid	This Study	msb3∆::Kan/msb3∆::Leu msb4∆::His/Msb4 Sec1-mNG::Ura3/Sec1-mNG::Ura3
9551	msb3∆/msb3∆ msb4∆/Msb4 Smy1-mNG/Smy1-mNG	Diploid	This Study	msb3∆::Kan/msb3∆::Leu msb4∆::His/Msb4 Smy1-mNG::Ura3/Smy1-mNG::Ura3
9552	msb3∆/msb3∆ msb4∆/Msb4 Sec2-mNG/Sec2-mNG	Diploid	This Study	msb3∆::Kan/msb3∆::Leu msb4∆::His/Msb4 Sec2-mNG::Leu2/Sec2-mNG::Ura3
9553	msb3∆/msb3∆ msb4∆/Msb4 Sec15-mNG/Sec15-mNG	Diploid	This Study	msb3∆::Kan/msb3∆::Leu msb4∆::His/Msb4 Sec15-mNG::Ura3/Sec15-mNG::Ura3
9256	mso1∆/mso1∆ Sec1-mNG/Sec1-mNG	Diploid	This Study	mso1∆::His/mso1∆::His Sec1-mNG::Leu/Sec1-mNG::Leu
9395	Mso1(1-37)-mNG	Unknown	This Study	Mso1(1-37)-mNG::Leu2
9556	Sec1(1-704)	a	This Study	Sec1(1-704)-tCYC::Ura3
9562	mso1∆::Mso1	α	This Study	mso1∆::Mso1::His3
9563	mso1∆::Mso1(38-210)	α	This Study	mso1∆::Mso1(38-210)::His3

## Sheet: Supplementary file 1b
Supplementary file 1b - Plasmids Used - Gingras et al. 2022
Plasmid ID	Backbone	Insert	Use	First Publication
4430	pFA6a-Ura3	mScarlet	Genomic tagging with mScarlet	Gingras et al., 2020
4278	pFA6a-Leu2	mNG	Genomic tagging with mNG
4279	pFA6a-Ura3	mNG	Genomic tagging with mNG
4277	pFA6a-His3	mNG	Genomic tagging with mNG
4307	pFA6a-Ura3	GFP	Genomic tagging with GFP
4354	pFA6a-His3	GFP	Genomic tagging with GFP
4600	bRA90 (pRS315)	empty	Cloning of CRISPR Targets	Anand et al., 2017
4601	bRA90 (pRS315)	mNG gRNA	CRISPR mNG target	This Study
4611	pFA6a-NatMX	mScarlet	mScarlet::NatMX template for CRISPR	This Study
3471	pRS306	pSec4-GFP-Sec4	N-terminal GFP-taggigng of Sec4	Donovan and Bretscher, 2012
4549	pRS315	pYpt31-mScarlet	PCR tagging of Ypt31	This Study
4113	pRS415	pYpt32-mNG	PCR tagging of Ypt32	This Study
5000	pRS415	pYpt1-mScarlet	PCR tagging of Ypt32	This Study
5001	pRS415	pCYC100-Tomato-mouseMyoVb(coiled coil)-Myo2(CBD)	Myo2 analog	This Study
5002	pRS303	pCYC100-mNG-mouseMyoVb(coiled coil)-Myo2(CBD)	His locus integrating Myo2 analog	This Study
3484	pRS415	pTOM-mCherry-2xIST2(928-948)	PM Marker	Manford et al., 2012
4095	pRS303	pTDH3-mCherry-2xIst2(928-948)	His locus integrating PM marker	This Study
5003	pRS315	pSec4-mScarlet-Sec4(Q79L)-2xIst2(928-948)	Constitutively-active PM-bound Sec4	This Study
16	YEp351	empty	Cloning and Control	Hill et al., 1986
4138	YEp351	Sec1 Locus	Overexpression	This Study
3945	YEp351	Rgd1 Locus	Overexpression	This Study
3956	YEp351	Sec2 Locus	Overexpression	This Study
3857	YEp351	Smy1 Locus	Overexpression	Lwin et al., 2016
3928	YEp352	Cdc42 Locus	Overexpression	Gingras et al., 2020
3863	YEp351	Rgd3 Locus	Overexpression	Gingras et al., 2020
3854	YEp351	Ypt31 Locus	Overexpression	Gingras et al., 2020
4132	YEp352	pMyo2-Myo2-3xFLAG	Overexpression	This Study
3052	pRS425	empty	Cloning and Control	Christianson et al., 1992
4432	pRS425	Rho3 Locus	Overexpression	Gingras et al., 2020
4140	pRS425	Sro7 Locus	Overexpression	This Study
4153	pRS425	Sec9 Locus	Overexpression	This Study
4154	pRS425	Mso1 Locus	Overexpression	This Study
4447	pRS425	Boi2 Locus	Overexpression	This Study
4371	pRS425	Sso2 Locus	Overexpression	This Study
5004	pRS415	pCYC1-mNG-Sec1(670-724)	Sec1 C-terminus localization	This Study
5005	pRS303	pMso1-Mso1(38-210)	PCR Integration of N-terminally truncated Mso1	This Study

## Sheet: Supplementary file 1c
Supplementary file 1c - Oligos Used - Gingras et al. 2022
Oligo ID	Sequence	Use
AMM253	GGACAATATGGCTTCGCTTCGTTTT	Forward gRNA oligo targeting mNG sequence 61bp after start codon with overhang for inserting into bRA90 plasmid.
AMM254	GAAGCGAAGCCATATTGTCCGATCA	Reverse gRNA oligo targeting mNG sequence 61bp after start codon with overhang for inserting into bRA90 plasmid.
AMM283	CGGATCCCCGGGTTAATTAACATGGTGAGCAAGGGCGAGCCGTCATCAAAGAATTCATG	Forward primer for amplifying mScarlet-NatMX repair to replace mNG with CRISPR
AMM284	GCTTCCCAGCCTGCTTTTCTGTAACGTTCACCCTCTACCTGAATTCGAGCTCGTTTAAAC	Reverse primer for amplifying mScarlet-NatMX repair to replace mNG with CRISPR
CF1	GCAGACTGGAAAAGATGTAATGAAAGGTGCCCTTGGTTTTCGGATCCCCGGGTTAATTAA	Amplifying tag from pFA6a plasmids - Sro7-F
CF2	AGGAAGTTGCTCATTACCCTGTATGAATTAGTGTATGTATGAATTCGAGCTCGTTTAAAC	Amplifying tag from pFA6a plasmids - Sro7-R
CF3	ATTCTCGAGGTTCTTGAAAAGAAAATCTCACCATGATAAACGGATCCCCGGGTTAATTAA	Amplifying tag from pFA6a plasmids - Sec1-F
CF4	AGAGCAAGTGATTTTTTTTATCACTGTCTTCTTTAAGGGAGAATTCGAGCTCGTTTAAAC	Amplifying tag from pFA6a plasmids - Sec1-R
CF21	ATTCGAAACACTTCCAAATACAAAATAAGAACGCGCAACGAATTAAGGCGCGCCAGATCT	Amplifying deletion cassette from pFA6a plasmids - Snc2-F
CF22	gtatatattTTTTAGAATTAGCATCGGGAACCGATGAGCGAATTCGAGCTCGTTTAAACC	Amplifying deletion cassette from pFA6a plasmids - Snc2-R
CF23	TTACAATTAAAAAAGGCAATTAAAAATAGAAACAAATCAAAATTAAGGCGCGCCAGATCT	Amplifying deletion cassette from pFA6a plasmids - Sso1-F
CF24	GGGAGTTCGGATAGAATAGAAATATAGAAAATAGTTGGAAAATTCGAGCTCGTTTAAACC	Amplifying deletion cassette from pFA6a plasmids - Sso1-R
CF25	CATAACTGTTAGTGAATAACCACTTATATAGCATAACACAAATTAAGGCGCGCCAGATCT	Amplifying deletion cassette from pFA6a plasmids - Gdi1-F
CF26	TTTACCCTCCAATTGCTGCTTTAGTCGTAAAGGTATGAATAATTCGAGCTCGTTTAAACC	Amplifying deletion cassette from pFA6a plasmids - Gdi1-R
CF27	CAAAGTAGAAGAGTGTGCACATGCTTGGTTTGGCGGAACGAATTAAGGCGCGCCAGATCT	Amplifying deletion cassette from pFA6a plasmids - Sec1-F
CF31	TATAACTTACAGTCTACTGTCGTCACGCTGGGTCAATTTAAATTAAGGCGCGCCAGATCT	Amplifying deletion cassette from pFA6a plasmids - Sec9-F
CF32	TCCCTTCATTGCTTACTGAGAGGTTTTCCTCCCCCCCTCCAATTCGAGCTCGTTTAAACC	Amplifying deletion cassette from pFA6a plasmids - Sec9-R
CF35	ATAACCAGGCACTTCAGCTTCTAGACAATTCTGAAAACTTAATTAAGGCGCGCCAGATCT	Amplifying deletion cassette from pFA6a plasmids - Sso2-F
CF36	TTTTAGGACCAATTACCGTAGTTGCGACTACAACAATTGTAATTCGAGCTCGTTTAAACC	Amplifying deletion cassette from pFA6a plasmids - Sso2-R
RMG82	ATGATAATGTCATCAACTATGTCGACAGAAGCCGCCTTGGCGGATCCCCGGGTTAATTAA	Amplifying deletion cassette from pFA6a plasmids - Msb4
RMG83	CTATTTTCTTCTTTCCTTTGGGCGGCTACTCGCCCTTTGTGAATTCGAGCTCGTTTAAAC	Amplifying deletion cassette from pFA6a plasmids - Msb4
RMG131	GGAGTCAAAGAGTTGCGCACCCAGAACCATTGTAATTAGCCGGATCCCCGGGTTAATTAA	Amplifying deletion cassette from pFA6a plasmids - Msb3
RMG132	ACATATTTGTTTATGCAAAAACAAAAACAGGAAGCAAAAGGAATTCGAGCTCGTTTAAAC	Amplifying deletion cassette from pFA6a plasmids - Msb3
RMG201	CTCTAATACGAGTAGGATAGCCAAATTTTTTAATAGACGTCGGATCCCCGGGTTAATTAA	Amplifying tag from pFA6a plasmids - Sec15-F
RMG202	TGAACGTACAAATGATTATACTGAGATAATATCTAATTTTGAATTCGAGCTCGTTTAAAC	Amplifying tag from pFA6a plasmids - Sec15-R
RMG203	ATTGGACGAGTTTATCAAAAAGAACAGTGATAAAATTCGCCGGATCCCCGGGTTAATTAA	Amplifying tag from pFA6a plasmids - Exo84-F
RMG204	ATCATATATATTGAAGTGAGGTTTATTTTCTGTGATCTTGGAATTCGAGCTCGTTTAAAC	Amplifying tag from pFA6a plasmids - Exo84-R
RMG240	ATTTCTAAGCAGAGTTGGTGAATTATACCTTTCTACTGATcggatccccgggttaattaa	Amplifying tag from pFA6a plasmids - Sec7-F
RMG241	ACTAAGCATATTTTAATCTGCTGGACCATTCAACAAAGCCgaattcgagctcgtttaaac	Amplifying tag from pFA6a plasmids - Sec7-R
RMG242	AAGCAATGATGACAATTTCGATGATGCCCAGGAACAGCAAcggatccccgggttaattaa	Amplifying tag from pFA6a plasmids - Sec2-F
RMG243	AAATGTCCATTAGGACACATAAAATTAAATATTATATAATgaattcgagctcgtttaaac	Amplifying tag from pFA6a plasmids - Sec2-R
RMG244	ATATTTTCCTTTACTAGCTGTGTTTGATAAAGGTTTCAATcggatccccgggttaattaa	Amplifying deletion cassette from pFA6a plasmids - Sec2-R
RMG251	GAACGATATCATAAGTGCGTTCGAGGAATACAAGAATGCCcggatccccgggttaattaa	Amplifying tag from pFA6a plasmids - Sec3-F
RMG252	AGTCTAAATATGTAATATGAAGCGACAATGCAGAGGTTACgaattcgagctcgtttaaac	Amplifying tag from pFA6a plasmids - Sec3-R
RMG415	CAATTTAAAAAGAACTGCTATTCAATTCGCCGCCTTCAGCcggatccccgggttaattaa	Amplifying tag from pFA6a plasmids - Sec5-F
RMG416	TGTTAATAATCATTGTTAGTACATCTTTATACCTCTGTTTgaattcgagctcgtttaaac	Amplifying tag from pFA6a plasmids - Sec5-R
RMG417	TACTTTGATGAGGCGGTTTGTATTAGAATTCGAAAAGCAAcggatccccgggttaattaa	Amplifying tag from pFA6a plasmids - Sec6-F
RMG418	TGAAGGGAAAACTATACTATGTTATATGTAATCAGTGAACgaattcgagctcgtttaaac	Amplifying tag from pFA6a plasmids - Sec6-R
RMG419	TAAAAGCAAATTGAATGCTGTCCATACTGCAAACGAAAAAcggatccccgggttaattaa	Amplifying tag from pFA6a plasmids - Sec8-F
RMG420	TCATTTATTTATCAAATTAATTTTACACAAACTAAAAATGgaattcgagctcgtttaaac	Amplifying tag from pFA6a plasmids - Sec8-R
RMG421	TCATGACAATTTCATTAATAGCGTTAAATTGAATTTTAGAcggatccccgggttaattaa	Amplifying tag from pFA6a plasmids - Sec10-F
RMG422	AAAAGGCATTCTGCCAAAAAACGTGAATACTCTATGTACGgaattcgagctcgtttaaac	Amplifying tag from pFA6a plasmids - Sec10-R
RMG423	CCCTGACGAACTAACTACTGTTCTTAACCAATTAGTGAGAcggatccccgggttaattaa	Amplifying tag from pFA6a plasmids - Exo70-F
RMG424	TTTTCTTTAATTTTGCTTTTTGAAAAGTGATGTTCGCAATgaattcgagctcgtttaaac	Amplifying tag from pFA6a plasmids - Exo70-R
RMG738	AGTTGACCTTGTTGCCCAACAAGTCGTTCAAGACGGCCACcggatccccgggttaattaa	Amplifying tag from pFA6a plasmids - Myo2-F
RMG739	ttAGCATTCATGTACAATTTTGTTTCTCGCGCCATCAGTTgaattcgagctcgtttaaac	Amplifying tag from pFA6a plasmids - Myo2-R
RMG844	AGTCACTTCGAGTACTCCAAAAAGTCCCTCTTCTGGAAGCCGGATCCCCGGGTTAATTAA	Amplifying tag from pFA6a plasmids - Smy1-F
RMG845	TACAAAGATACTACACAGTTGTATCGTACAATTATCGAACgaattcgagctcgtttaaac	Amplifying tag from pFA6a plasmids - Smy1-R
JP40	AAGCAGCAGGTTCTCTCAAGTCAGAACCACCCGAATAAGGCGCGCCACTTCTAAATAAGC	Amplifying truncation from pFA6a plasmids - Sec1-704-term-F
CF9	GAAGGACAGACTAAAGAGACGCAATAACGATTATGGATTTCGGATCCCCGGGTTAATTAA	Amplifying tag from pFA6a plasmids - Mso1-F
JP41	CCCTAATACCAACTACCAGTATAACTAAGATTTCACGCATCGGATCCCCGGGTTAATTAA	Amplifying deletion cassette from pFA6a plasmids - Mso1-F
JP2	ATCGTTATCTACATCGTTGGCACATTTATCCATTAAAGCACGGATCCCCGGGTTAATTAA	Amplifying truncation tag from pFA6a plasmids - Mso1-1-37-F
JP42	AATGTTCTTTTCGCTTTATTTCAGCAAGGTATAGTGCTATGAATTCGAGCTCGTTTAAAC	Amplifying tag from pFA6a plasmids - Mso1-R
RMG744	TCGAGATTTTTACGCACTAAAAAAGAC	Amplifying mouse myosin 5b CC geneBlock for recombination into Myo2 plasmid-F
RMG745	AGCACCGCCTCCCATTACATC	Amplifying mouse myosin 5b CC geneBlock for recombination into Myo2 plasmid-R
RMG761	GTACGGCATGGACGAGCTGTACAAGTTGAAACAATTGAAGGCAGACGCTAAATCAGTAA	Amplifying MouseCC-Myo2-Tail Fusion for Gibson-F
RMG762	tgacataactaattacatgactcgaGTCGACTTAGTGGCCGTCTTGAACGACTTGTTGGGCAACAAGG	Amplifying MouseCC-Myo2-Tail Fusion for Gibson-R
RMG759	ATAAATTACTATACTTCTATtctagGGATCCATGGTGAGCAAGGGCGAGGAGGTCATCAAAG	Amplifying Tomato for Gibson-F
RMG760	TAGCGTCTGCCTTCAATTGTTTCAACTTGTACAGCTCGTCCATGCCGTAC	Amplifying Tomato for Gibson-R
RMG870	CCTTTGCAGCATAAATTACTATACTTCTATtctagGGATCCatgGTGAGCAAGGGCGAGG	Replacing Tomato with mNG via recombination
RMG871	CAATTTTTACTGATTTAGCGTCTGCCTTCAATTGTTTCAACTTGTACAGCTCGTCCATGC	Replacing Tomato with mNG via recombination
JP15	actaaagggaacaaaagctggagctAAGGGACCAGGCTTACTAGCGCCAT	Amplifying pMso1-F
JP16	agcccgggggatccactagttctagATGCGTGAAATCTTAGTTATACTGGTAG	Amplifying pMso1-R
JP18	ATAGTCGACAAATCCATAATCGTTATTGCGTCTC	Amplifying Mso1(38-210)-SalI—F
JP19	ataTCTAGAatgGAAAAAGATGGTGATACTGTAAATACTACATTG	Amplifying XbaI-Start-Mso1(38-210)-F
RMG895	AAGGGACCAGGCTTACTAGCGC	Amplifying pMso1-Mso1(Start-38-210)-His-F
RMG897	AATGTTCTTTTCGCTTTATTTCAGCAAGGTATAGTGCTATctccttacgcatctgtgcgg	Amplifying pMso1-Mso1(Start-38-210)-His-R
AMM338	TTACTTCGGGGATAATTCAAAACATAAAACCGACAAAATAcggatccccgggttaat	Amplifying tag from pFA6a plasmids - Boi2-F
AMM339	GAACAATAGCTTAATGAGTTTATGCATCAAATTTGAGGCGGAATTCGAGCTCGTTTAAAC	Amplifying tag from pFA6a plasmids - Boi2-F

## Sheet: Supplementary file 1d
Supplementary file 1d - Mouse Protein Fragment Used - Gingras et al. 2022
Sequence	Description
VKIEARSVERYKKLHIGMENKIMQLQRKVDEQNKDYKCLMEKLTNLEGVYNSETEKLRNDVERLQLSEEEAKVATGRVLSLQEEIAKLRKDLEQTRSEKKSIEERADKYKQETDQLVSNLKEENTLLKQEKETLNHRIVEQAKEMTETMERKLVEE	Mouse Myosin5b Coiled-Coil Protein Fragment Used
TTGAAACAATTGAAGGCAGACGCTAAATCAGTAAAAATTGAAGCACGTTCTGTGGAAAGATACAAAAAACTACACATTGGTATGGAAAACAAAATCATGCAGTTACAACGTAAAGTTGACGAGCAAAATAAGGACTACAAATGTCTTATGGAAAAGCTTACTAATTTGGAGGGAGTTTACAACTCGGAGACGGAGAAGTTGCGAAATGATGTTGAAAGATTACAGTTGAGTGAAGAAGAAGCGAAAGTAGCAACCGGCAGAGTATTAAGCTTACAAGAGGAAATAGCTAAGTTAAGAAAGGATCTCGAGCAGACTCGCTCAGAAAAGAAATCCATAGAAGAAAGAGCTGATAAATATAAGCAAGAAACTGATCAACTGGTCTCAAATCTTAAGGAGGAA…	DNA geneBlock containing a codon optimized Myosin5b Coiled-coil and homology to Myo2 at either end. For use with RMG744 and RMG745.

## Sheet: Supplementary file 1e
Supplementary file 1e - Exact Sample Sizes - Gingras et al. 2022
Number of Events (n)	Component Examined (in context of genotype)	Phenomenon Measured
180	GFP-Sec4/Sec4	Vesicle tethering time by Sec4
100	GFP-Sec4	Vesicle tethering time by Sec4
54	GFP-Sec4/GFP-Sec4	Vesicle tethering time by Sec4
223	Sec1-mNG/Sec1-mNG	Punctum longevity
83	Mso1-mNG/Mso1-mNG	Punctum longevity
66	Sec3-mNG/Sec3-mNG	Tethering to disappearance time
61	Sec15-mNG/Sec15-mNG	Tethering to disappearance time
66	Sec2-mNG/Sec2-mNG	Tethering to disappearance time
50	Sro7-mNG/Sro7-mNG	Punctum longevity
63	Smy1-mNG/Smy1-mNG	Tethering to disappearance time
74	Boi2-mNG/Boi2-mNG	Punctum longevity
42	Bni1-GFP/Bni1	Punctum longevity
45	GFP-Sec4/Sec4 Exocyst-3x-mScarlet/Exocyst-3x-mScarlet	Vesicle tethering time by Sec4
28	GFP-Sec4/Sec4 with mScarlet-Sec4(Q79L)-PM	Vesicle tethering time by Sec4
51	GFP-Sec4/Sec4 msb3∆/msb3∆ msb4∆/Msb4	Vesicle tethering time by Sec4
78	Sec2-mNG/Sec2-mNG msb3∆/msb3∆ msb4∆/Msb4	Tethering to disappearance time
53	Sec1-mNG/Sec1-mNG msb3∆/msb3∆ msb4∆/Msb4	Punctum longevity
43	Sro7-mNG/Sro7-mNG msb3∆/msb3∆ msb4∆/Msb4	Punctum longevity
45	Smy1-mNG/Smy1-mNG msb3∆/msb3∆ msb4∆/Msb4	Tethering to disappearance time
59	Sec15-mNG/Sec15-mNG msb3∆/msb3∆ msb4∆/Msb4	Tethering to disappearance time
80	Sec1-mNG/Sec1-mNG mso1∆/mso1∆	Punctum longevity
72	GFP-Sec4/Sec4 Overexpressed: Msb3	Vesicle tethering time by Sec4
117	GFP-Sec4/Sec4(Q79L)	Vesicle tethering time by Sec4
97	GFP-Sec4/Sec4 msb4∆/msb4∆ msb3∆/Msb3	Vesicle tethering time by Sec4
77	GFP-Sec4/Sec4 gdi1∆/Gdi1	Vesicle tethering time by Sec5
64	GFP-Sec4/Sec4 sec2∆/Sec2	Vesicle tethering time by Sec4
77	GFP-Sec4/Sec4 Overexpressed: Sec2	Vesicle tethering time by Sec4
41	GFP-Sec4/Sec4 snc2∆/Snc2	Vesicle tethering time by Sec4
72	GFP-Sec4/Sec4 Overexpressed: Snc2	Vesicle tethering time by Sec4
90	GFP-Sec4/Sec4 sso2∆/sso2∆	Vesicle tethering time by Sec4
74	GFP-Sec4/Sec4 Overexpressed: Sso2	Vesicle tethering time by Sec4
88	GFP-Sec4/Sec4 sec9∆/Sec9	Vesicle tethering time by Sec4
75	GFP-Sec4/Sec4 Overexpressed: Sec9	Vesicle tethering time by Sec4
44	GFP-Sec4/Sec4 sso1∆/Sso1	Vesicle tethering time by Sec4
55	GFP-Sec4/Sec4 mso1∆/mso1∆	Vesicle tethering time by Sec4
50	GFP-Sec4/Sec4 Overexpressed: Mso1	Vesicle tethering time by Sec4
103	GFP-Sec4/Sec4 sec1∆/Sec1	Vesicle tethering time by Sec4
78	GFP-Sec4/Sec4 Overexpressed: Sec1	Vesicle tethering time by Sec4
118	GFP-Sec4/Sec4 sro7∆/sro7∆	Vesicle tethering time by Sec4
90	GFP-Sec4/Sec4 Overexpressed: Sro7	Vesicle tethering time by Sec4
56	GFP-Sec4/Sec4 myo2∆/Myo2	Vesicle tethering time by Sec4
93	GFP-Sec4/Sec4 Overexpressed: Myo2	Vesicle tethering time by Sec4
50	GFP-Sec4/Sec4 smy1∆/smy1∆	Vesicle tethering time by Sec4
86	GFP-Sec4/Sec4 Overexpressed: Smy1	Vesicle tethering time by Sec4
82	GFP-Sec4/Sec4 rho3∆/Rho3	Vesicle tethering time by Sec4
54	GFP-Sec4/Sec4 Overexpressed: Rho3	Vesicle tethering time by Sec4
79	GFP-Sec4/Sec4 Overexpressed: Cdc42	Vesicle tethering time by Sec4
64	GFP-Sec4/Sec4 Overexpressed: Ypt31	Vesicle tethering time by Sec4
47	GFP-Sec4/Sec4 Overexpressed: Rgd1	Vesicle tethering time by Sec4
84	GFP-Sec4/Sec4 Overexpressed: Rgd3	Vesicle tethering time by Sec4
39	GFP-Sec4/Sec4 Overexpressed: Boi2	Vesicle tethering time by Sec4
66	GFP-Sec4/Sec4 Overexpressed: EV 351	Vesicle tethering time by Sec4
103	GFP-Sec4/Sec4 Overexpressed: EV 425	Vesicle tethering time by Sec4
20	Sec3-mNG/Sec3-mNG	Number of Molecules
34	Sec5-mNG/Sec5-mNG	Number of Molecules
15	Sec2-mNG/Sec2-mNG	Number of Molecules
17	Sro7-mNG/Sro7-mNG	Number of Molecules
10	Sec1-mNG/Sec1-mNG	Number of Molecules
12	Sec1-mNG/Sec1-mNG mso1∆/mso1∆	Number of Molecules
24	Tomato-Myo2-Marker GFP-Sec4/Sec4	Time between Myo2-loss and fusion
29	GFP-Sec4/Sec4	Pre-LatrunculinB Tether-to-fusion
24	GFP-Sec4/Sec4	Tether-to-fusion 1-2min post LatB
18	GFP-Sec4/Sec4	Tether-to-fusion 2-3min post LatB
28	GFP-Sec4/Sec4	Tether-to-fusion 3-4min post LatB
8	GFP-Sec4/Sec4	Tether-to-fusion 4-5min post LatB
56	GFP-Sec4/Sec4	Tether-to-fusion 5+min post LatB

## Sheet: Supplementary file 1f
Supplementary file 1f - Tethering and Component Raw Data - Gingras et al. 2022
Component	GFP-Sec4	Sec3-mNG	Sec15-mNG	Sec2-mNG	Sro7-mNG	Smy1-mNG	Sec1-mNG	Mso1-mNG	Boi2	Bni1-GFP	GFP-Sec4	GFP-Sec4	GFP-Sec4	GFP-Sec4	GFP-Sec4	GFP-Sec4	GFP-Sec4	Sec1-mNG	Sro7-mNG	Sec1-mNG	Sec15-mNG	Smy1-mNG	Sec2-mNG	GFP-Sec4	GFP-Sec4	GFP-Sec4	GFP-Sec4	GFP-Sec4	GFP-Sec4	GFP-Sec4	GFP-Sec4	GFP-Sec4	GFP-Sec4	GFP-Sec4	GFP-Sec4	GFP-Sec4	GFP-Sec4	GFP-Sec4	GFP-Sec4	GFP-Sec4	GFP-Sec4	GFP-Sec4	GFP-Sec4	GFP-Sec4	GFP-Sec4	GFP-Sec4	GFP-Sec4	GFP-Sec4	GFP-Sec4
Context	GFP-Sec4/Sec4	Sec3-mNG/Sec3-mNG	Sec15-mNG/Sec15-mNG	Sec2-mNG/Sec2-mNG	Sro7-mNG/Sro7-mNG	Smy1-mNG/Smy1-mNG	Sec1-mNG/Sec1-mNG	Mso1-mNG/Mso1-mNG	Boi2-mNG/Boi2-mNG	Bni1-GFP/Bni1	GFP-Sec4/Sec4(Q79L)	GFP-Sec4 Haploid	GFP-Sec4/GFP-Sec4	Sec4 (msb4∆)	Sec4 (msb3∆)	GFP-Sec4/Sec4 in Exocyst-3x-mScarlet	GFP-Sec4/Sec4 in mScarlet-Sec4(Q)-Ist2	Sec1-mNG mso1∆∆	Sro7 (msb3∆)	Sec1 (msb3∆)	Sec15 (msb3∆)	Smy1 (msb3∆)	Sec2 (msb3∆)	YEp351-Smy1	YEp351-Myo2-3xFLAG	YEp351-Rgd1	YEp351-Ypt31	YEp351-Sec1	YEp351-Rgd3	YEp351-Cdc42	YEp351	YEp351-Sec2	YEp351-Msb3	pRS425-Mso1	pRS425-Rho3	pRS425-Boi2	pRS425-Sro7	pRS425	pRS425-Snc2	pRS425-Sso2	pRS425-Sec9	Sec2/sec2∆	Snc2/snc2∆	sso2∆/sso2∆	Sec9/sec9∆	Sso1/sso1∆	Rho3/rho3∆	mso1∆/mso1∆	Gdi1/gdi1∆
Mean	5.02076	4.50189	4.77597	2.80179	3.79473	3.02011	2.32799	2.64514	19.6586	6.43566	8.14523	7.97972	7.3678	5.73549	7.27492	6.25848	4.896	2.38683	5.9064	4.43067	6.30095	4.32081	3.30764	4.71392	4.30833	5.18293	5.12904	5.86967	5.48329	4.98175	5.03495	4.70505	5.43453	4.82571	4.62841	4.51099	6.44499	4.77278	4.91361	4.49384	4.91087	4.83202	4.75102	6.67241	5.72515	6.03868	5.42143	6.28196	5.35601
Median	4.97139	4.23648	4.57626	2.45714	3.37838	2.99217	2.067	2.49907	16.502	6.39138	7.743	7.391	7.09882	5.717	6.727	5.80833	4.92828	2.10606	4.6759	3.86111	5.9064	3.93744	2.95308	4.576	4.22424	5.2803	4.75227	5.94472	5.489	4.92828	5.10429	4.40025	5.16531	4.57626	4.75227	4.40025	6.57384	4.75227	4.75227	4.324	4.6986	5.10429	4.54002	5.96676	5.63481	6.03812	5.01312	6.51237	5.33664
	9.204	4.75227	6.53124	4.92828	5.24922	2.11212	1.477	2.39162	44	11.7896	8.098	5.914	7.07476	3.701	6.728	4.75227	3.5202	2.10606	5.6603	3.5101	7.92045	8.8045	1.93699	7.04	4.04823	3.34419	3.16818	5.94472	2.397	1.23207	8.8005	3.69621	3.75936	6.16	5.45631	4.57626	4.06731	4.75227	4.40025	5.632	4.6986	2.64015	3.5087	15.0384	4.68915	7.36736	7.82475	8.27247	3.1335
	8.8324	8.44848	5.64864	4.21212	3.70532	3.69621	1.969	1.36664	40	1.14093	4.386	4.928	8.59078	6.393	5.382	7.21641	4.92828	2.10606	5.4142	5.26515	8.62449	1.58481	5.63488	3.52	5.10429	2.99217	6.51237	5.95194	3.082	2.99217	5.10429	4.57626	4.38592	3.87222	1.93611	4.22424	8.44749	3.16818	5.2803	3.344	6.57804	4.75227	4.3184	5.9527	10.6287	8.44223	6.2598	8.27247	2.5068
	8.82644	3.69621	4.94256	1.75505	3.10593	4.04823	1.478	2.39162	28	6.84558	6.073	10.849	5.67502	7.738	7.737	3.5202	4.22424	1.05303	3.4454	3.5101	5.98434	1.93699	5.63488	1.76	6.68838	5.98434	9.32853	5.32542	6.164	2.28813	7.21641	2.11212	7.20498	4.40025	5.98434	4.57626	5.94453	4.57626	2.46414	2.816	7.8255	2.99217	6.6765	7.8325	6.2522	9.17367	4.37682	9.85656	1.8801
	8.27247	7.0404	6.1782	1.05606	3.2694	5.45631	3.94	2.04996	10	8.36638	6.073	9.856	7.16213	4.037	6.727	4.92828	2.28813	1.05303	4.922	4.91414	11.4406	3.16962	2.81744	6.512	6.51237	6.33636	3.69621	5.32321	4.452	6.51237	4.22424	5.63232	6.89172	3.34419	3.87222	5.2803	7.82775	3.34419	3.5202	2.64	4.38228	6.33636	3.47178	10.6522	4.68915	7.41364	8.12838	5.2803	6.2686
	8.0598	2.64015	5.11908	2.81616	3.43287	2.64015	1.478	3.4166	34	7.98609	10.122	6.406	4.9394	5.383	6.39	6.68838	5.98434	0.70202	4.1837	2.10606	5.2803	1.58481	3.69789	3.696	5.10429	5.63232	8.44848	7.51512	3.089	10.2086	3.34419	4.92828	6.89172	4.04823	5.63232	2.81616	6.57531	2.99217	3.34419	5.104	5.62788	5.10429	4.54002	4.6971	5.00176	4.84738	4.37682	9.85656	2.82087
	7.92045	2.64015	4.76604	4.22424	2.94246	3.5202	3.94	1.7083	18	11.4093	3.712	8.87	7.398	3.028	11.775	5.80833	6.33636	0.35101	4.4298	4.91414	4.75227	1.93699	3.16962	3.872	3.69621	2.99217	8.09646	4.3799	6.19	4.75227	5.2803	4.22424	5.00288	2.28813	6.16035	7.39242	7.83175	5.2803	3.5202	5.104	9.3798	4.04823	4.54002	5.32338	7.19003	6.55822	2.5004	6.86439	6.5814
	7.86277	1.93611	4.05996	3.87222	2.56103	1.23207	0.492	4.10292	74	6.08496	8.773	8.624	8.631	5.047	11.101	5.80833	4.75227	1.05303	16.9809	5.26515	5.80833	0.52827	3.16962	6.16	3.34419	5.45631	4.92828	6.257	8.253	2.46414	5.45631	3.69621	2.81412	4.75227	2.11212	5.80833	12.2156	5.63232	5.80833	2.64	5.00624	3.16818	3.47178	3.1314	6.87346	7.48359	4.06315	6.68838	5.3278
	7.79492	4.22424	3.70692	3.69621	3.48736	3.87222	3.939	2.39337	10	8.74621	4.054	9.115	5.1786	7.739	7.4	6.51237	5.45631	1.05303	2.9532	5.61616	5.80833	4.75443	2.46526	7.216	5.45631	6.86439	9.85656	6.257	7.566	5.63232	5.45631	3.5202	7.50432	7.0404	5.2803	4.40025	5.3176	5.98434	5.2803	4.224	6.57069	3.16818	5.60826	10.6383	5.31131	6.37491	7.18819	7.74444	5.3278
	7.59591	6.86439	3.35388	2.99217	3.21491	3.5202	3.939	2.05146	30	3.42288	3.716	6.652	2.7126	4.038	9.418	7.21641	4.40025	2.10606	7.383	3.86111	5.2803	3.69789	1.58481	4.928	2.11212	7.21641	6.16035	7.19555	6.191	6.68838	4.40025	3.16818	8.1458	4.75227	4.92828	3.69621	8.1328	5.2803	4.57626	3.168	5.63202	4.40025	4.28768	5.31913	4.06211	9.486	2.50024	6.16035	3.76056
	7.54124	6.51237	3.70692	3.34419	2.94246	4.04823	1.477	4.10292	78	7.6064	5.744	11.093	13.0698	7.739	9.082	7.56843	4.22424	2.10606	11.0745	2.80808	3.69621	4.22616	5.2827	4.576	4.75227	5.10429	4.75227	4.06575	8.936	4.92828	4.92828	5.63232	2.8197	4.40025	3.87222	4.04823	8.7584	4.57626	2.64015	3.696	6.57741	3.87222	3.48374	10.9512	6.56187	4.743	3.75036	4.04823	3.44718
	7.22088	4.40025	3.5304	2.99217	2.7245	2.99217	3.448	3.4198	26	7.98672	7.433	5.917	6.66441	5.72	10.764	4.04823	5.80833	1.75505	2.7071	2.80808	5.98434	5.45879	7.21969	2.112	5.45631	4.92828	3.69621	3.44025	5.156	3.87222	6.16035	2.99217	4.0729	4.57626	3.87222	5.2803	7.82	2.81616	4.40025	3.168	4.07173	4.92828	3.47126	3.75468	6.56187	4.46784	4.68795	7.92045	6.89436
	7.1903	4.57626	5.2956	4.40025	5.23104	1.7601	3.448	3.4198	32	9.8878	3.716	12.081	5.91792	6.729	3.7	4.92828	6.16035	1.05303	3.6915	3.5101	8.97651	3.5218	2.99353	3.344	5.98434	5.45631	4.92828	5.95289	6.874	5.2803	5.2803	5.2803	7.2059	6.33636	3.16818	4.40025	5.0048	5.80833	6.68838	3.872	4.6917	5.80833	0.80229	3.44179	3.1247	12.0073	5.98291	5.98434	2.50624
	7.1851	7.39242	4.05996	0.52803	3.32389	4.92828	2.463	2.05188	51.412	5.3242	6.081	8.132	8.87832	6.056	5.045	3.5202	3.34419	2.10606	6.6447	0.70202	4.57626	7.74796	2.46526	5.632	5.10429	4.40025	3.69621	5.95289	4.122	3.69621	4.04823	5.80833	5.00816	5.63232	4.04823	5.45631	8.1328	7.74444	4.57626	2.112	7.51224	6.16035	3.47659	8.13514	7.18773	7.26024	5.03824	3.16818	4.38354
	7.17	4.04823	4.413	5.10429	3.21491	3.69621	1.97	3.07737	5.267	5.70405	10.449	7.637	5.42564	8.411	5.381	4.40025	4.40025	2.80808	4.4298	2.10606	12.3207	9.68495	4.40225	2.464	1.40808	8.27247	7.0404	5.63958	7.557	6.16035	5.2803	4.22424	5.32117	5.98434	2.46414	3.16818	5.63796	3.5202	5.63232	2.64	5.00944	3.69621	6.15089	5.6529	2.50008	9.01626	5.98291	7.21641	3.131
	7.16604	1.7601	3.17736	1.23207	2.45205	5.63232	2.955	3.07737	12.038	6.46459	8.427	13.801	8.13846	6.729	5.381	6.33636	4.40025	1.40404	3.4454	7.0202	5.98434	6.69142	0.52827	4.576	3.16818	5.80833	5.98434	4.6911	3.091	4.75227	4.57626	3.87222	5.94529	6.33636	1.93611	2.46414	5.94985	3.69621	5.2803	4.576	10.9581	5.45631	3.74402	6.90382	4.37752	5.77354	7.839	4.57626	5.6358
	7.16604	3.34419	3.17736	2.64015	2.50654	0.35202	2.462	3.4193	7.774	4.94377	10.449	13.308	5.91888	7.065	8.093	2.81616	6.86439	0.70202	3.9376	5.96717	10.7366	1.05654	2.70699	6.903	6.33636	7.0404	5.2803	6.2548	9.619	5.2803	2.99217	5.10429	3.75492	3.34419	4.40025	5.80833	5.31726	5.2803	3.16818	4.576	9.3948	5.63232	6.4056	5.33477	2.81412	6.45278	7.20682	6.51237	5.95669
	7.14	5.2803	2.29476	1.7601	2.50654	0.70404	1.97	3.76541	16.301	6.46493	5.393	4.435	9.36548	5.719	7.736	4.75227	4.57626	2.10606	9.5979	2.80808	9.15252	7.0436	1.47654	3.872	4.40025	7.56843	5.45631	6.56754	7.214	3.87222	5.63232	4.92828	4.38074	4.22424	4.57626	4.92828	5.94282	4.22424	6.51237	7.04	5.32372	3.5202	5.0711	7.53144	5.31641	5.5044	6.2668	5.80833	6.90184
	7.04032	4.23648	4.40025	3.5202	2.88797	2.81616	1.477	1.71155	9.279	11.0284	7.512	6.899	9.11976	8.072	5.045	2.64015	4.57626	2.80808	8.6135	3.15909	3.16818	5.81097	4.18353	1.408	6.16035	4.22424	4.40025	8.77072	4.472	4.75227	1.40808	7.39242	6.2662	4.75227	3.5202	3.5402	6.88116	4.57626	3.87222	4.984	10.0211	4.92828	4.8087	5.01344	5.31641	6.26612	8.14684	4.40025	7.856
	7.0109	3.70692	3.34419	2.28813	1.96164	5.2803	1.477	3.08079	5.517	8.36638	7.735	10.102	7.14792	5.045	6.39	3.16818	3.7563	1.05303	5.9064	8.42424	4.92828	7.39578	2.4609	2.816	4.75227	5.80833	5.10429	6.57804	3.784	4.57626	7.56843	3.5202	6.2662	7.39242	5.80833	4.98428	5.00448	2.64015	3.5202	3.872	5.63232	5.45631	5.60532	3.44674	8.44371	3.26928	4.7001	4.40025	5.02784
	7.00775	5.64864	5.80833	2.28813	5.34002	5.63232	4.431	1.71155	18.558	8.74667	6.919	9.362	11.2549	8.072	6.054	4.40025	3.6683	2.10606	7.8752	2.10606	9.15252	7.21969	6.64443	4.752	2.11212	4.57626	4.22424	6.2648	5.504	3.5202	5.2803	2.11212	4.69935	3.34419	8.44848	2.86416	4.06926	3.34419	5.80833	3.168	2.99217	2.81616	4.28976	4.07342	5.62914	7.69244	9.3834	2.64015	5.34174
	7.00258	2.29476	5.98434	2.64015	4.03226	2.28813	0.985	3.07899	6.27	5.70435	9.693	4.681	4.76652	4.372	4.373	4.22424	5.21	1.40404	8.8596	3.5101	7.21641	3.16962	3.44526	2.992	3.69621	7.56843	4.04823	5.01184	3.774	6.33636	3.16818	4.75227	6.2632	5.45631	5.2803	2.70015	8.44857	7.21641	2.64015	3.52	2.81616	6.68838	8.57952	6.2694	3.1269	3.29676	7.19877	3.16818	5.97018
	6.932	4.05996	5.98434	1.93611	5.66696	4.04823	1.477	2.73688	10.784	9.50725	6.092	6.406	5.19192	4.036	5.381	5.80833	5.012	1.05303	7.8752	6.66919	6.16035	5.10661	1.47654	5.28	5.80833	8.27247	5.45631	5.0104	4.803	7.39242	5.10429	4.22424	4.6974	6.16035	2.46414	3.80121	10.326	6.16035	3.69621	6.512	2.64015	2.28813	2.40804	5.01552	3.1269	3.02203	6.2598	5.63232	3.1375
	6.91236	2.29476	4.22424	4.04823	2.61552	2.11212	3.446	4.10388	9.781	4.18319	8.031	7.39	6.05724	6.39	7.064	6.16035	5.569	2.80808	6.6447	3.15909	4.92828	5.45879	3.19917	5.984	3.69621	7.74444	4.57626	7.20245	4.803	4.04823	4.22424	5.45631	6.57048	3.87222	3.34419	5.64231	5.63238	2.46414	5.10429	4.928	3.16818	5.45631	5.61519	5.64012	5.94111	8.53833	6.88358	3.34419	6.58875
	6.87249	4.76604	5.45631	2.11212	5.23104	4.75227	5.908	4.10964	31.6	3.8027	6.092	10.099	10.1067	5.717	11.436	3.34419	6.312	1.75505	3.6915	4.21212	4.75227	6.33924	3.19917	3.52	2.64015	3.87222	7.74444	4.06588	4.117	3.5202	5.10429	3.87222	4.07303	4.04823	4.75227	3.29418	4.38074	6.16035	7.39242	4.928	2.46414	3.34419	2.18584	5.64012	7.19187	7.02078	8.76092	11.7927	5.63274
	6.81972	4.23648	5.2803	1.93611	4.3592	1.23207	3.446	2.05482	14.295	9.12648	7.2	5.173	9.47505	6.731	5.718	4.40025	5.312	2.10606	2.2149	5.61616	6.33636	8.8045	2.95308	3.696	5.98434	4.40025	7.92045	7.819	5.489	5.80833	4.22424	4.75227	7.20383	6.68838	3.16818	3.6802	6.57111	7.74444	3.34419	4.224	4.40025	4.75227	4.37168	7.52016	5.94111	5.94066	4.69335	6.33636	3.44531
	6.7975	3.70692	4.92828	1.23207	3.32389	4.92828	3.446	2.73976	33.606	10.6476	8.861	8.375	13.2651	4.038	7.064	4.40025	5.80833	1.40404	4.1837	8.77525	6.6447	3.34571	1.23045	6.336	3.16818	4.57626	2.81616	9.3828	4.114	2.46414	4.22424	4.92828	5.95099	4.224	4.40025	4.44024	10.326	4.22424	5.63232	3.344	4.75227	3.34419	5.5024	3.1328	6.57405	8.1009	8.1458	5.10429	3.76488
	6.78888	0.52956	4.22424	0.35202	4.3592	2.46414	3.94	2.39729	15.549	3.0424	8.861	5.42	9.5487	5.048	12.445	6.86439	4.92828	1.75505	2.461	2.45707	7.6291	7.57187	1.23045	5.28	4.04823	1.05606	6.51237	6.57804	6.171	4.75227	3.87222	4.92828	6.259	5.632	7.74444	2.04611	10.6457	4.92828	6.68838	4.4	3.5202	4.40025	3.26676	3.75936	9.3822	2.97033	5.0128	4.57626	6.2972
	6.778	7.9434	4.75227	0.70404	7.24032	4.75227	1.478	2.73768	6.771	2.2818	8.031	6.406	9.5487	5.721	6.391	5	5.267	1.75505	4.922	3.86111	5.4142	1.72263	2.70699	3.872	4.22424	2.99217	6.68838	8.14346	1.714	4.92828	4.75227	3.5202	5.64048	4.048	3.87222	5.04927	6.57384	2.64015	4.22424	6.688	3.5202	2.11212	4.13265	5.32967	9.06946	4.84038	4.39278	4.04823	4.09318
	6.74125	5.2956	3.5202	0.70404	3.62016	4.22424	1.97	3.07989	24.327	13.3105	7.754	5.913	6.5628	5.721	7.4	4.4		1.05303	2.461	4.21212	3.4454	0.98436	2.95308	1.056	5.2803	5.10429	4.04823	3.75852	5.149	3.5202	3.16818	6.68838	8.77408	4.4	5.45631	5.07627	6.57384	4.92828	7.0404	3.872	5.2803	5.10429	5.23469	7.83775	6.88028	4.84038	4.69755	8.09646	4.40804
	6.72744	4.413	7.92045	5.63232	4.0242	1.58409	3.94	2.73768	6.27	6.8454	6.925	5.172	9.00456	4.375	2.355	8.6		1.40404	14.5199	3.5101	5.9064	4.42962	5.66007	6.688	7.56843	5.45631	2.81616	8.1263	5.5	6.16035	3.34419	7.56843	4.3806	6.336	8.44848	3.7802	6.2608	5.10429	4.75227	4.048	5.98434	5.2803	5.4706	12.2187	3.75732	2.15128	6.2628	2.64015	4.09318
	6.68838	3.35388	6.51237	4.75227	2.41452	0.35202	0.985	5.47536	9.781	6.08464	6.648	6.896	8.1088	7.74	8.409	4		3.51	4.6759	3.86111	3.4454	1.96872	2.70699	5.104	4.22424	5.80833	5.2803	7.50744	4.468	5.80833	5.98434	4.57626	3.4419	4.752	4.22424	4.18022	10.0173	5.80833	4.75227	5.984	5.2803	5.98434	4.4	5.3261	4.69665	4.03365	5.32338	3.34419	2.51048
	6.61914	2.6478	7.56843	4.04823	2.81302	2.46414	1.478	2.73744	9.781	9.88754	6.925	6.899	10.7152	6.394	6.391	14.2		2.808	4.922	4.91414	8.6135	0.98436	3.93744	5.456	4.22424	2.64015	6.86439	8.44587	4.125	5.10429	5.80833	7.74444	6.88204	4.928	5.10429	5.15727	5.94776	2.11212	3.5202	6.16	3.5202	2.64015	4.71104	7.2059	6.2622	5.3966	4.39138	8.27247	4.7061
	6.53744	4.76604	6.51237	2.64015	4.42046	1.40808	2.463	2.73744	12.038	2.45707	11.634	9.117	5.792	4.038	4.373	13.2		3.159	4.1837	7.0202	7.6291	4.9218	4.18353	8.977	4.75227	3.69621	3.16818	4.69215	4.127	8.09646	4.04823	5.2803	8.45856	1.936	4.40025	3.87222	7.8285	4.22424	4.92828	5.456	3.5202	3.69621	1.33295	5.0144	4.69665	6.20609	3.76404	8.09646	4.39236
	6.51237	5.64864	6.68838	1.7601	3.21488	4.22424	0.493	1.36872	19.06	6.31818	15.523	13.553	10.1174	3.365	13.791	10.6		2.808	2.2149	2.45707	4.1837	2.21481	1.72263	6.512	3.69621	6.86439	3.69621	7.82025	5.847	5.63232	3.69621	4.75227	5.95232	8.448	6.51237	3.34419	4.6971	6.33636	7.21641	3.872	3.87222	2.81616	3.24408	2.5072	6.2582	7.01558	5.0184	2.81616	9.4122
	6.51237	4.413	6.16035	5.10429	4.82232	3.5202	1.478	3.77421	29.092	1.05303	4.718	9.61	7.80489	8.076	9.418	9.4		1.404	3.6915	3.86111	4.6759	3.69135	2.4609	2.64	2.99217	4.75227	4.92828	5.00256	7.91	5.2803	5.63232	3.5202	3.4463	5.104	3.87222	6.51237	3.75768	5.98434	4.75227	4.752	2.28813	4.75227	4.94139	4.701	5.63238	3.49882	6.88908	7.0404	6.90228
	6.51237	5.82516	5.10429	0.70404	6.42976	3.5202	3.449	1.7114	15.8	1.40404	11.457	17	5.34132	5.048	7.064	8		4.563	3.1993	3.86111	5.9064	6.39834	4.42962	6.512	5.63232	3.69621	4.92828	4.37724	6.191	2.46414	6.16035	2.81616	6.5793	4.752	4.22424	4.92828	7.20222	3.69621	5.2803	4.224	5.80833	2.99217	8.47322	5.32406	2.81619	7.26678	3.44454	11.0886	3.1351
	6.41856	2.82432	5.2803	4.04823	6.42976	3.34419	3.939	3.08052	8.276	0.70202	9.436	7.145	4.47516	9.759	6.727	5.6		2.457	3.4454	3.5101	12.305	3.93744	2.21481	4.928	4.92828	4.40025	6.16035	6.87852	5.847	5.2803	7.21641	4.40025	10.6522	3.872	5.2803	5.63232	8.76792	3.34419	5.10429	2.992	4.22424	5.2803	7.06272	8.76904	6.254	8.34334	3.1314	5.63232	6.2702
	6.33636	5.2956	3.34419	1.23207	3.21488	5.80833	2.462	2.3968	22.261	12.2853	7.751	7.39	10.3939	5.721	6.391	9		3.861	11.0745	3.5101	7.1369	2.95308	1.23045	3.696	2.99217	5.63232	5.10429	6.87852	7.555	5.98434	7.0404	2.99217	6.2572	4.224	5.2803	5.45631	5.63652	4.04823	5.80833	3.872	5.80833	5.63232	6.58392	5.32406	6.5667	3.49882	5.63652	7.39242	2.8197
	6.33636	2.82432	5.10429	3.5102	1.60744	3.5202	3.447	3.424	19.479	3.5101	15.165	6.158	5.05036	5.047	6.054	13.4		3.51	7.1369	2.10606	5.1681	2.70699	4.18353	5.28	4.40025	5.63232	2.64015	5.31522	4.121	6.16035	6.86439	2.11212	9.399	8.624	3.16818	8.97651	6.57594	3.5202	6.86439	5.28	2.81616	6.68838	8.07592	4.06653	10.9445	4.84452	8.14164	4.04823	7.8325
	6.30844	3.34419	4.75227	0.35102	7.236	2.81616	5.417	1.0272	9.739	2.80808	9.773	7.636	7.93628	5.384	8.072	4.6		3.861	3.6915	2.10606	3.9376	2.4609	3.19917	3.52	2.81616	5.2803	3.87222	5.01648	5.838	4.75227	5.63232	3.16818	6.8926	5.808	4.75227	3.5202	8.14164	5.45631	6.68838	4.048	5.98434	8.09646	6.55248	4.37934	8.1302	3.77146	2.81826	7.39242	4.3925
	6.286	2.64015	3.69621	1.05306	3.618	1.7601	1.477	2.0544	30.609	4.91414	9.436	9.116	5.23073	3.701	5.381	6.4		3.159	14.0277	4.56313	7.6291	3.19917	5.90616	6.864	4.57626	6.16035	8.8005	6.251	6.181	4.04823	4.22424	6.68838	6.5793	4.928	5.63232	6.86439	5.01024	4.40025	3.34419	3.872	3.16818	4.04823	4.91436	10.3353	7.1921	5.11841	5.33035	7.39242	6.2714
	6.16682	4.22424	4.04823	6.66938	3.62088	2.28813	2.955	2.0544	14.828	2.10606	7.072	8.624	7.75591	4.71	10.09	6.2		3.51	8.8596	5.26515	6.6447	2.95308	4.67571	3.344	2.11212	4.92828	4.57626	5.0008	4.807	5.63232	8.8005	3.5202	4.3862	4.6816	5.2803	4.04823	4.6971	6.86439	4.92828	2.816	2.28813	2.28813		10.3353	5.9413	5.65719	4.3897	7.21641	5.64426
	6.16035	4.75227	7.0404	1.05306	4.42552	2.99217	2.462	3.07926	3.707		13.457	8.624	4.32888	4.374	6.054	9.2		1.755	1.7227	8.42424	8.3674	4.42962	5.41398	3.696	4.22424	5.2803	5.63232	7.18865	5.151	7.0404	2.46414	2.81616	6.5793	4.4352	5.80833	4.57626	5.01024	6.68838	5.10429	3.168	5.45631	5.80833		8.14294	4.37472	4.59306	7.83875	6.86439	10.0378
	6.16035	2.46414	4.22424	3.5102	2.81624	2.11212	4.924	2.73712	14.389		8.411	7.392	7.15616	7.402	8.744	5.6		2.106		8.07323	6.6447	4.18353	2.95308	5.984	3.69621	4.92828	7.92045	7.8165	3.777	3.87222	5.10429	5.10429	3.4463	4.1888	5.2803	3.16818	7.5156	4.75227	3.16818	4.576	3.5202	6.16035		6.2638	3.74976	6.13558	3.7626	2.99217	3.1368
	6.16035	3.34419	5.98434	3.15918	2.41086	4.22424	5.909	2.39449	28.314		10.1	6.406	7.10613	7.402	6.726	8		1.404		3.15909	5.6603	6.64443	2.4609	6.336	2.64015	4.92828	6.51237	4.06458	4.121	3.87222	7.74444	7.56843	5.3261	3.9424	4.92828	4.04823	7.20245	3.5202	4.04823	4.048	5.2803	5.80833		6.57699	2.81241		6.57678	4.57626	11.6062
	6.16035	3.69621	4.57626	2.45714	4.8258	2.11212	1.478	3.76277	6.962		6.733	6.406	9.62766	5.383	8.744			2.106		3.15909	4.4298		0.98436	8.977	4.04823	5.63232	4.04823	4.37724	7.901	6.16035	5.45631	3.69621	4.3862	3.696	2.46414	5.98434	4.3862	7.92045	3.5202	6.864	3.34419	5.2803		4.69785	4.99984		5.01088	7.74444	5.65038
	6.16035	5.98434	4.40025	1.7551	2.0115	3.16818	2.463	2.73656	19.934		7.07	17.001	5.48352	5.383	9.418			2.457		4.91414	4.4298		2.21481	3.344	3.69621	2.28813	1.7601	5.00256	5.84	5.45631	5.45631	4.04823	2.1931	3.4496	2.11212	4.75227	6.5793	5.45631	4.40025	4.576	2.99217	5.63232		7.83475	1.87494		7.8295	8.09646	6.59211
	6.16028	6.51237	4.04823	2.45714	4.4253	0.17601	0.985	3.76277	11.134		10.773	10.595	5.48352	5.047	4.709			2.457		4.21212	5.6603		2.21481	4.048	5.98434		5.10429	6.2532	6.871	3.34419	4.22424	6.86439	4.06926	3.2032	4.75227	4.57626	5.9527	4.92828	4.75227	4.928	2.81616	5.10429		11.2885	5.31233		7.51368	8.09646	7.21993
	6.136	5.63232	3.34419	1.40408	6.0345	5.63232	1.97	4.10244	18.997		8.08	11.088	5.93996	5.047	6.054			3.51		6.31818	3.1993		4.9218	5.632	5.63232		4.04823	9.3771	7.901	7.39242	4.40025	4.04823	5.63562	2.9568	4.40025	4.40025	1.25084	2.81616	5.2803	2.112	6.86439	5.63232		11.2885	4.68825		4.38298	7.56843	5.33647
	6.0357	3.86111	1.93611	2.45714	2.41194	2.99217	1.478	2.73792	5.097		9.09	6.653	6.8538	5.383	8.409			2.808		9.47727	5.4142		4.42962	2.464	4.92828		3.69621	3.75192	5.507	5.63232	6.33636	3.5202	5.00944	4.38452	5.63232	4.22424	4.37794	5.63232	2.81616	4.048	3.34419	6.16035		5.95783	6.56355		2.81826	7.56843	7.20544
	6.0285	5.96717	3.69621	2.45714		1.40808	2.955	4.79136	29.19		7.743	6.16	6.39688	4.374	5.046			2.457		3.86111	4.922		3.69135	3.52	2.99217		3.69621	4.38606	3.786	4.57626	6.68838	6.51237	6.8816	5.95042	4.22424	4.57626	9.69401	4.40025	4.04823	4.048	3.69621	6.68838		4.38914	5.31335		6.2628	5.63232	4.07264
	6.00446	4.56313	4.40025	2.45714		1.58409	1.477	2.45707	10.657		7.743	5.676	5.48304	4.374				4.563		4.91414	4.4298		2.70699	5.808	4.40025		4.75227	7.51896	4.482	4.22424	2.99217	7.0404	4.04823		5.10429	4.04823	3.4463	6.86439	4.04823	4.248	2.99217	4.04823		6.89722	3.44355		6.2628	7.0404	7.51872
	5.98434	4.21212	5.45631	1.40408		1.05606	3.447	1.75505	18.538		11.452	6.17	6.39688	3.701				3.159		4.91414	6.8908		2.70699	3.344	2.81616		4.40025	4.69935	8.274	5.10429	4.75227	4.22424	2.64015		5.80833	2.99217	3.133	5.45631	4.04823	4.576	4.40025	9.15252		6.2916	6.261		3.1314	6.51237	5.63238
	5.9323	5.61616	4.57626	1.05306		0.70404	1.97	1.75505	9.732		13.136	5.182	7.09152	4.71				3.159			4.1837		7.13661	2.288	4.57626		3.87222	4.37444	4.827	3.16818	3.69621	2.99217	4.57626		5.2803	5.63232	8.4591	7.39242	4.22424	4.4	4.40025	5.2803		6.60618	5.32185		10.9669	6.33636	7.82275
	5.90793	8.77525	4.22424	2.10612		1.23207	2.462	1.75505	13.456		7.073	5.182		8.074				3.861			7.8752		3.69135	4.576	2.11212		4.75227	5.62428	4.137	6.51237	6.51237	5.80833	4.40025			4.04823	6.5793	4.92828	4.75227	8.272	3.5202	4.22424		7.54992	5.65632		5.01344	6.33636	5.00656
	5.895	7.0202	5.2803	2.45714		3.69621	0.493	1.40404	6.96		9.768	7.403		4.037				5.967			5.9064		1.96872	3.344	4.22424		3.34419	5.0024	5.854	4.22424	3.34419	4.04823	8.44848			3.87222	4.3862	7.92045	6.16035	4.928	3.16818	6.86439		5.0224	6.2848		4.7079		8.13566
	5.80833	4.91414	3.87222	1.7551		2.11212	1.478	1.75505	13.92		9.754	4.689		3.028				2.457			4.6759		1.72263	4.752	3.69621		4.04823	4.3771	5.166	7.74444	6.68838	2.81616	4.75227				7.82825	4.75227	5.80833	7.92	4.75227	5.80833		5.9641	5.96068		4.7079		6.57153
	5.80335	3.15909	2.81616	1.05306		2.64015	0.493	2.45707	16.707		15.135	9.131		10.092				2.106			6.3986		7.13661	8.096	2.64015		4.04823	8.97651	4.133	2.28813	4.75227	5.80833	5.63232				8.45451	1.7601	8.27247	4.048	3.5202	5.45631		8.45559	5.64696		6.59106		3.1309
	5.78736	4.91414	6.16035	6.31836		1.23207	0.985	1.40404	14.387		6.39	3.702		6.728				1.053			7.383		2.21481	7.216	5.63232		4.22424	5.80833	6.543	4.92828	4.04823	1.93611	5.63232				5.95954	5.10429	2.81616	5.28	5.45631	2.64015		6.2634	3.1372		4.6986		5.94871
	5.78312	3.15909	6.51237	3.5102		6.51237	5.418	2.10606	24.597		6.39	3.455		4.71				1.404					6.15225		4.92828		3.5202	6.16035	7.569	5.98434	3.5202	2.99217	4.75227				5.01856	3.69621	4.57626	5.808	5.2803	7.92045		9.08193	2.5064		6.89128		4.69635
	5.7099	5.26515	4.22424	5.2653		0.70404	1.97	1.40404	37.591		10.763	6.651		5.719				2.457					0.98436		2.99217		4.40025	3.5202	5.849	10.7366	4.57626	4.22424	7.0404				5.33222	4.92828	7.74444	5.984	4.04823	8.44848		4.38382	5.0128		5.01184		7.53768
	5.66118	3.15909		5.61632		4.04823	1.97	1.05303	26.917		16.481	6.651		2.692				1.404					0.73827		4.40025		7.56843	6.51237	4.469	4.40025	3.5202	4.04823	3.87222				7.52784	7.21641	4.92828	5.104	3.87222	5.63232		5.63634	6.266		4.6995		5.96448
	5.6574	3.5101		4.56326		4.57626	2.463	2.10606	26.894		12.468	3.449		5.722				3.861					2.70699		2.81616		5.80833	6.86439	6.532	2.99217	5.45631	6.33636	4.57626				8.46882	5.2803	7.92045	5.104	5.80833	2.99217		5.63634	10.6522		4.0651		5.33664
	5.6574	4.21212		3.15918			2.955	2.45707	19.939		7.076	6.159		4.376				2.106					1.96872		4.57626		3.69621	3.69621	4.455	2.28813	5.63232	4.40025	4.75227				2.8197	4.22424	3.87222	4.4	7.0404	1.93611		8.45451	5.0136		2.8143		5.96448
	5.63232	3.15909		4.91428			3.939	6.31818	15.765		6.402	10.839		8.078				2.106					3.93744		2.11212			3.69621	4.112	4.57626	4.75227	2.28813	4.92828				6.57657	3.16818	3.5202	6.512	4.22424			5.32321	5.6403		4.3778		5.65056
	5.61687	8.77525		1.7551			1.477	1.05603	16.703		6.405	3.449		6.059				2.457					1.47654		4.22424			5.80833	7.196	5.45631	5.45631	4.92828	6.86439				3.75804	3.69621	6.51237	4.224	2.99217			5.95916	5.0136		2.5016		2.50592
	5.6062						2.462	2.47107	2.784		8.428	6.651		7.405				4.91414					4.67571		3.69621			2.64015	6.168	3.69621		6.16035	2.28813				6.57657	5.2803	5.2803	5.456	6.51237			10.6638	4.70025		2.82105		3.1324
	5.56829						1.97	3.89411	17.167		4.723	5.173		3.702				4.56313					8.36706		2.64015			3.69621	8.91	4.57626		9.32853	3.5202				5.94605	3.5202	5.80833	4.048	4.22424			6.2728	5.63418		4.7133		5.32508
	5.53168						1.97	2.13006	18.094		8.094	4.927		5.047				1.75505					0.49218		5.63232			6.51237	7.555	5.98434		6.86439	3.87222				5.32015	4.75227	6.16035	3.52	4.75227			8.78192	5.32117		4.7133		3.44564
	5.5224						0.985	1.78005	9.279		6.07	5.42		3.701				2.45707					0.24609		4.92828			7.0404	4.464	5.2803		6.68838	5.80833				3.5202	3.5202	7.56843	3.52	5.98434			8.46828	5.32627		3.44949		5.32525
	5.5224						1.97	2.49907	10.671		5.733	11.961		4.374				2.10606					4.42962		2.99217			4.57626	3.434	2.11212		4.40025	4.22424				9.15252	2.99217	3.87222	4.576	7.21641			5.95916	7.51944		3.76308		2.506
	5.51584						4.433	1.79005	26.917		6.07	12.008		4.038				2.10606					2.21481		4.40025			4.75227	5.489	6.16035		3.16818	4.04823				0.17601	3.5202	4.75227	4.928	5.10429			9.07729	6.57951		8.14814		4.69635
	5.47848						0.985	3.5901	29.238		8.094	11.692		7.739				2.80808					4.42962		2.81616			8.62449	6.861	3.69621		4.75227					6.86439	5.2803		3.872	7.0404			8.77016	8.14918		6.58119		6.2618
	5.45631						1.97	2.52007	19.956		8.094	8.532		5.047				2.45707					1.96872		3.5202			6.86439	7.204	5.10429		4.04823					5.10429	4.40025		5.28	2.99217			9.08338	8.46261		5.01424		3.7734
	5.41566						1.97	1.80505			9.78	7.584		5.72				4.56313					0.49218		7.21641			4.04823	3.774	4.75227		8.09646					5.80833	5.45631			6.68838			8.77072	6.56124		2.50624		6.60345
	5.33856						1.477	1.44804			6.07	8.848		5.384				2.10606					4.67571		4.22424				5.489	3.87222		4.40025					6.68838	3.16818						3.75888	5.31148		3.1328		8.49015
	5.295						2.462	2.17806			5.387	9.164		6.393				2.80808					6.15225		4.40025				5.489	7.74444		4.75227					5.98434	6.86439						4.7127	4.37892		5.63904		8.16218
	5.2803						5.909	2.54807			5.045	13.272		4.374				4.56313					3.93744		6.16035				3.774	5.98434		4.75227					9.15252	2.99217						7.54032	6.2632		3.1328
	5.19099						1.97	2.55507			9.082	8.667		4.713				2.45707							5.45631				2.398	5.98434		7.0404					9.50454	3.5202						5.96942	4.07108		5.95232
	5.15452						4.924	1.83005			7.064	6.099		7.069				1.40404							2.99217				5.138			7.56843					10.5606	4.22424						6.2836	5.95004		6.5793
	5.15452						5.417	3.30309			7.064	4.108		6.396											4.75227				6.166			3.16818					7.21641	2.99217						15.3948	5.6313		4.71105
	5.13304						1.971	2.57607			10.437	6.004		7.443											2.28813				4.796			3.87222					6.68838	2.46414						3.1295	5.94415		8.47152
	5.10492						2.463	2.95208			5.723	11.232		6.766											4.22424				7.876								3.87222	9.15252						7.5108	5.0056
	5.10429						2.956				7.07	9.984		6.428											4.40025				4.794								7.39242	4.04823						6.89766	7.21579
	5.10429						1.478				10.773	6.552		6.089											3.87222												7.74444	5.45631						5.95707	3.44608
	5.10429						1.368				7.743	4.056		5.722											3.34419												6.51237	4.40025						6.5814	9.3984
	5.10207						3.077				9.837	4.056		7.068											7.0404												6.86439	0.88005						3.7608	5.63544
	5.08193						2.051				10.515	6.32		7.068											4.40025												6.16035	5.63232						5.01824	6.88776
	5.0145						5.469				8.819	12.008		8.751											7.74444												0.35202	6.68838						3.7596
	5.0145						2.051				12.211	6.004		6.731											5.45631												8.27247	6.16035						5.9527
	4.92828						1.025				5.427	10.112		5.385																								4.40025
	4.92828						4.785				4.75	7.584		5.385																								5.98434
	4.91778						2.735				8.822	14.852		4.04																								4.40025
	4.90308						2.735				10.179	11.692		6.392																								6.16035
	4.90308						3.419				13.572	7.584		4.71																								5.98434
	4.83624						2.051				15.947	7.409		5.383																								7.39242
	4.82436						1.71				5.466	9.102		6.392																								2.28813
	4.80025						1.367				8.199	5.822																										7.56843
	4.77736						2.734				8.698	6.15																										4.22424
	4.77736						3.418				4.722	11.07																										3.87222
	4.76368						2.051				7.086																											5.63232
	4.75227						2.734				6.1																											4.04823
	4.75227						3.759				11.037																											3.16818
	4.75227						3.076				6.69
	4.75227						4.1				7.854
	4.65307						2.05				4.945
	4.61334						2.733				5.236
	4.58166						2.392				5.549
	4.58031						3.758				4.896
	4.57626						2.392				6.854
	4.57626						3.447				7.507
	4.57626						3.447				10.771
	4.57626						2.413				8.8
	4.57626						2.758				5.867
	4.57626						3.792				11.52
	4.57626						2.412				7.784
	4.4002						2.067				4.952
	4.29888						4.139
	4.2952						3.449
	4.2952						2.414
	4.27448						2.757
	4.27448						2.068
	4.27448						2.45707
	4.26224						1.75505
	4.22424						1.05303
	4.22424						4.56313
	4.22422						3.5101
	4.14876						1.05303
	4.11705						1.75505
	4.04823						0.70202
	4.04823						1.05303
	4.04823						1.05303
	4.03221						3.5101
	4.02304						1.40404
	3.95668						1.75505
	3.87222						0.70202
	3.87222						0.70202
	3.8199						3.5101
	3.7751						2.45707
	3.76152						3.5101
	3.76152						1.05303
	3.69621						2.10606
	3.69621						1.05303
	3.69621						1.75505
	3.6816						2.10606
	3.6816						2.45707
	3.5799						2.45707
	3.53296						1.40404
	3.5202						1.40404
	3.5202						2.45707
	3.5202						1.40404
	3.51008						1.75505
	3.49089						1.75505
	3.34419						1.05303
	3.34419						1.05303
	3.27						3.15909
	3.26872						2.10606
	3.16818						1.40404
	3.16818						2.10606
	3.143						5.26515
	3.07216						2.10606
	2.99217						1.05303
	2.99217						0.35101
	2.81616						2.80808
	2.81616						2.45707
	2.81616						2.10606
	2.74095						1.75505
	2.64015						1.75505
	2.46414						2.45707
	2.46414						3.86111
	2.37						3.86111
	2.11212						1.40404
	2.11212						3.5101
	1.93611						1.75505
	1.7601						1.05303
	1.7601						3.86111
	1.7601						4.91414
	1.58409						1.75505
	1.01785						3.15909
	0.9						1.40404
							0.70202
							0.35101
							1.05303
							0.70202
							3.5101
							1.40404
							1.75505
							0.70202
							3.15909
							4.21212
							0.70202
							1.75505
							1.40404
							1.40404
							0.70202
							2.80808
							3.15909
							1.75505
							0.70202
							1.40404
							1.05303
							1.05303
							1.05303
							2.45707
							2.10606
							0.35101
							1.75505
							1.75505
							1.40404
							3.15909
							2.10606
							0.35101
							2.45707
							1.40404
							1.40404
							2.45707
							1.05303
							2.45707
							3.15909
							1.40404
							1.75505
							2.10606
							2.45707
[truncated: 16 more columns]
